# Supplementary material
Source: PubMed Central journal article supplement (PMC4286051)
Supplement: rspb20141517supp1.pdf [file rspb20141517supp1.pdf]

**ELECTRONIC SUPPLEMENTARY MATERIALS**

Assessing introduction risk using species' rank-abundance distributions

Farrah T. Chan<sup>1\*</sup>, Johanna Bradie<sup>2</sup>, Elizabeta Briski<sup>3</sup>, Sarah A. Bailey<sup>4</sup>, Nathalie Simard<sup>5</sup>, and  
Hugh J. MacIsaac<sup>1</sup>

<sup>1</sup> Great Lakes Institute for Environmental Research, University of Windsor, Windsor, Ontario,  
N9B 3P4, Canada

<sup>2</sup> Department of Biology, McGill University, Montreal, Québec, H3A 1B1, Canada

<sup>3</sup> GEOMAR, Helmholtz Centre for Ocean Research Kiel, Düsternbrooker Weg 20, D-24105 Kiel,  
Germany

<sup>4</sup> Great Lakes Laboratory for Fisheries and Aquatic Sciences, Fisheries and Oceans Canada,  
Burlington, Ontario, L7R 4A6, Canada

<sup>5</sup> Maurice Lamontagne Institute, Fisheries and Oceans Canada, Mont-Joli, Québec, G5H 3Z4,  
Canada

Number of tables: 1

Number of figures: 8



## 26 **Supplementary Figure Legends**

27 Fig. S1. Rank-abundance distributions (left panels) and corresponding colonization pressure:total  
28 propagule pressure curves (CP:total PP; right panels) highlighting changes in the structure  
29 of invertebrate assemblages in unexchanged ballast water of ships during trans-Atlantic  
30 voyages. The five lines on each graph depict rank-abundance distributions of CP:total PP  
31 relationships on five different days. Colour scheme for different days of the voyages  
32 applies to the entire figure. Also shown in each left panel are total PP (solid bar) and mean  
33 PP ( $\pm$  S.E.M; hatched bar) recorded at the last time point. Numeric values and circles in  
34 each right panel indicate observed total PP and estimated asymptotic species richness  
35 (Chao-1). Circles are offset when values overlap.

36 Fig. S2. Rank-abundance distributions (left panels) and corresponding CP:total PP curves (right  
37 panels) showing changes in the structure of invertebrate assemblages in unexchanged  
38 ballast water of ships during trans-Pacific voyages. Descriptions of symbols used are given  
39 in figure S1.

40 Fig. S3. Rank-abundance distributions (left panels) and corresponding CP:total PP curves (right  
41 panels) illustrating changes in the structure of diatom assemblages in unexchanged ballast  
42 water of ships during trans-Atlantic (a-f) and trans-Pacific (g-h) voyages. Descriptions of  
43 symbols used are given in figure S1.

44 Fig. S4. Rank-abundance distributions (left panels) and corresponding CP:total PP curves (right  
45 panels) demonstrating changes in the structure of dinoflagellate assemblages in  
46 unexchanged ballast water of ships during trans-Atlantic voyages. Descriptions of symbols  
47 used are given in figure S1.

48 Fig. S5. Rank-abundance distributions (left panels) and corresponding CP:total PP curves (right  
49 panels) highlighting changes in the structure of invertebrate assemblages in ships' ballast  
50 water before and after ballast water exchange during trans-Atlantic voyages. Descriptions of  
51 symbols used are given in figure S1.

52 Fig. S6. Rank-abundance distributions (left panels) and corresponding CP:total PP curves (right  
53 panels) illustrating changes in the structure of invertebrate assemblages in ships' ballast  
54 water before and after ballast water exchange during trans-Pacific voyages. Descriptions of  
55 symbols used are given in figure S1.

56 Fig. S7. Rank-abundance distributions (left panels) and corresponding CP:total PP curves (right  
57 panels) demonstrating changes in the structure of diatom assemblages in ships' ballast water  
58 before and after ballast water exchange trans-Atlantic (a-d) and trans-Pacific (e-f) voyages.  
59 Descriptions of symbols used are given in figure S1.

60 Fig. S8. Rank-abundance distributions (left panels) and corresponding CP:total PP curves (right  
61 panels) showing changes in the structure of diatom assemblages in ships' ballast water  
62 before and after ballast water exchange trans-Atlantic voyages. Descriptions of symbols  
63 used are given in figure S1.

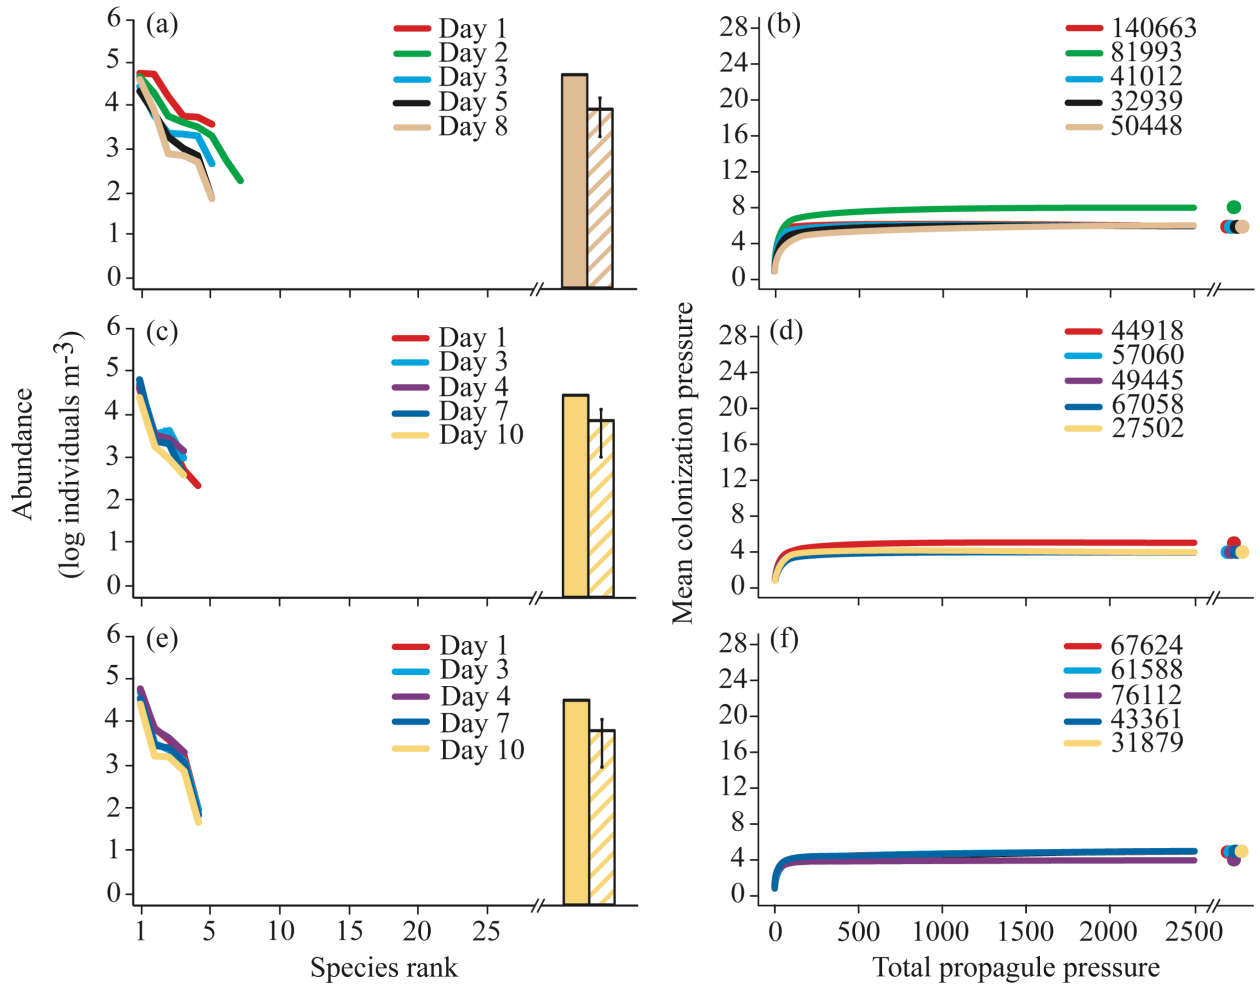

64

65 Figure S1.

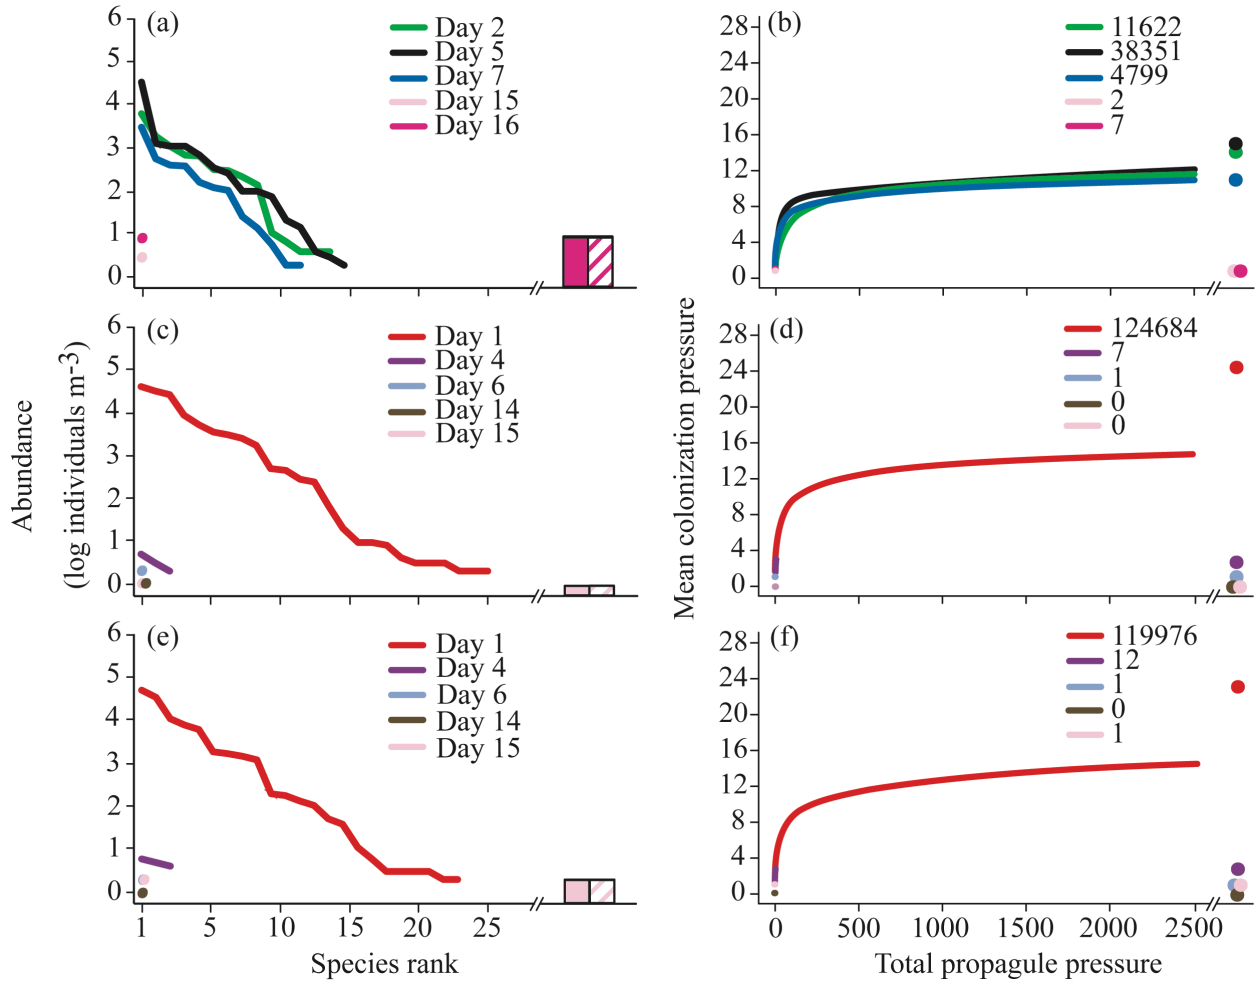

66

67 Figure S2.

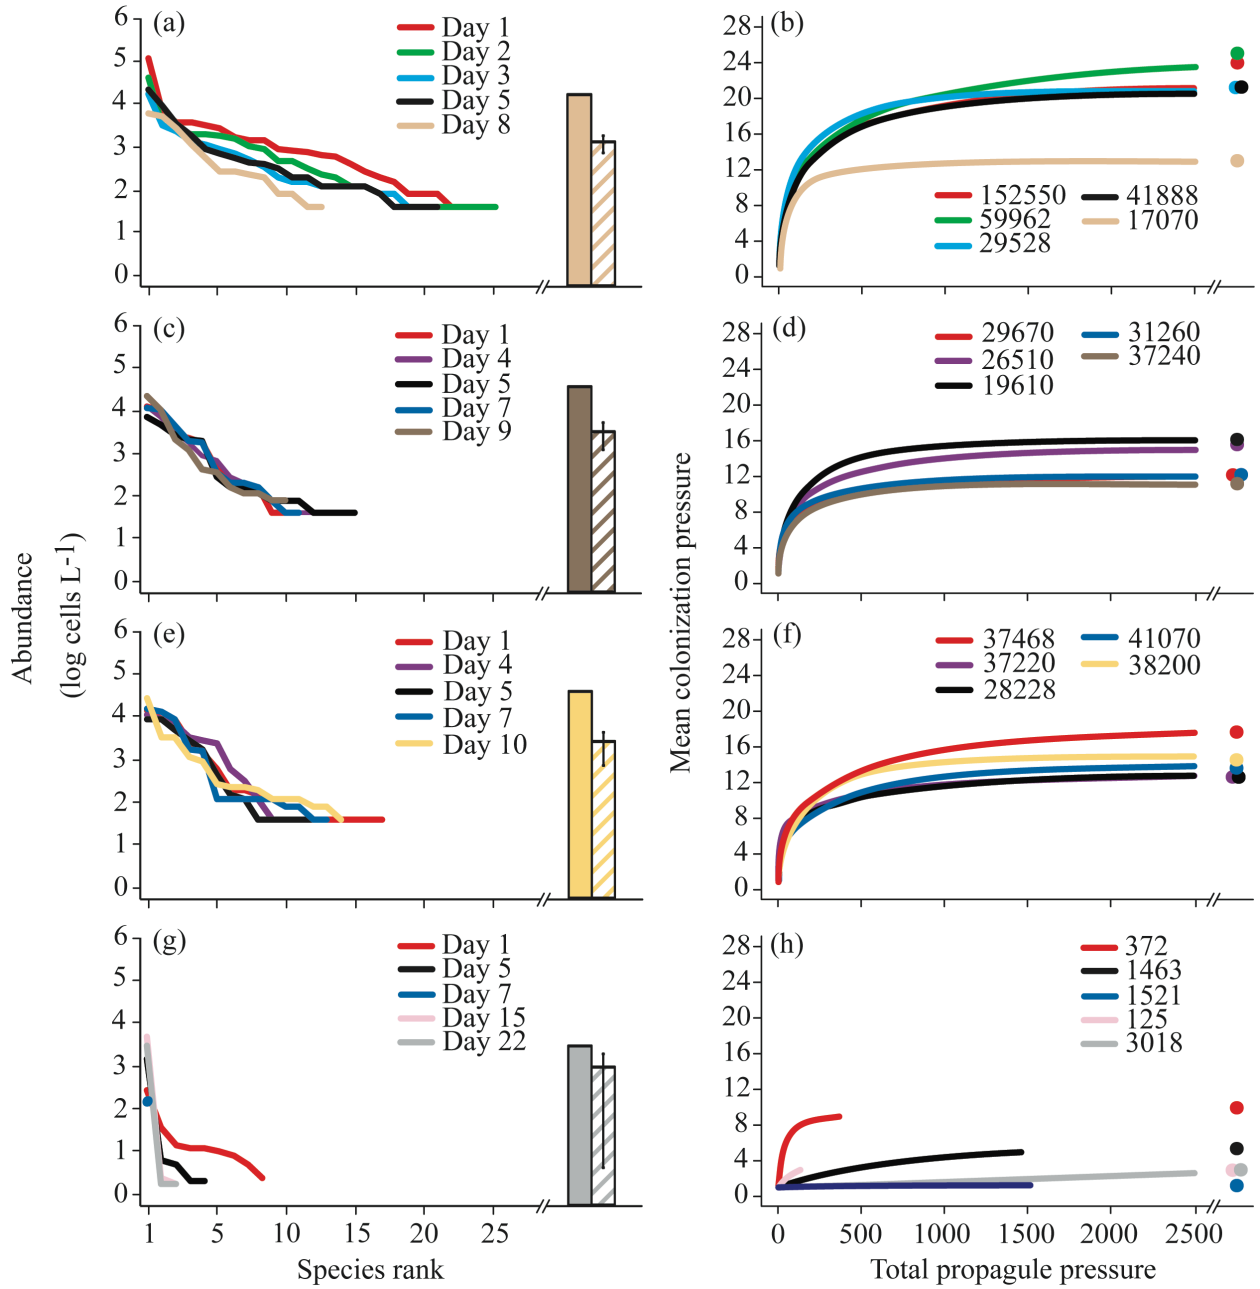

68

69 Figure S3.

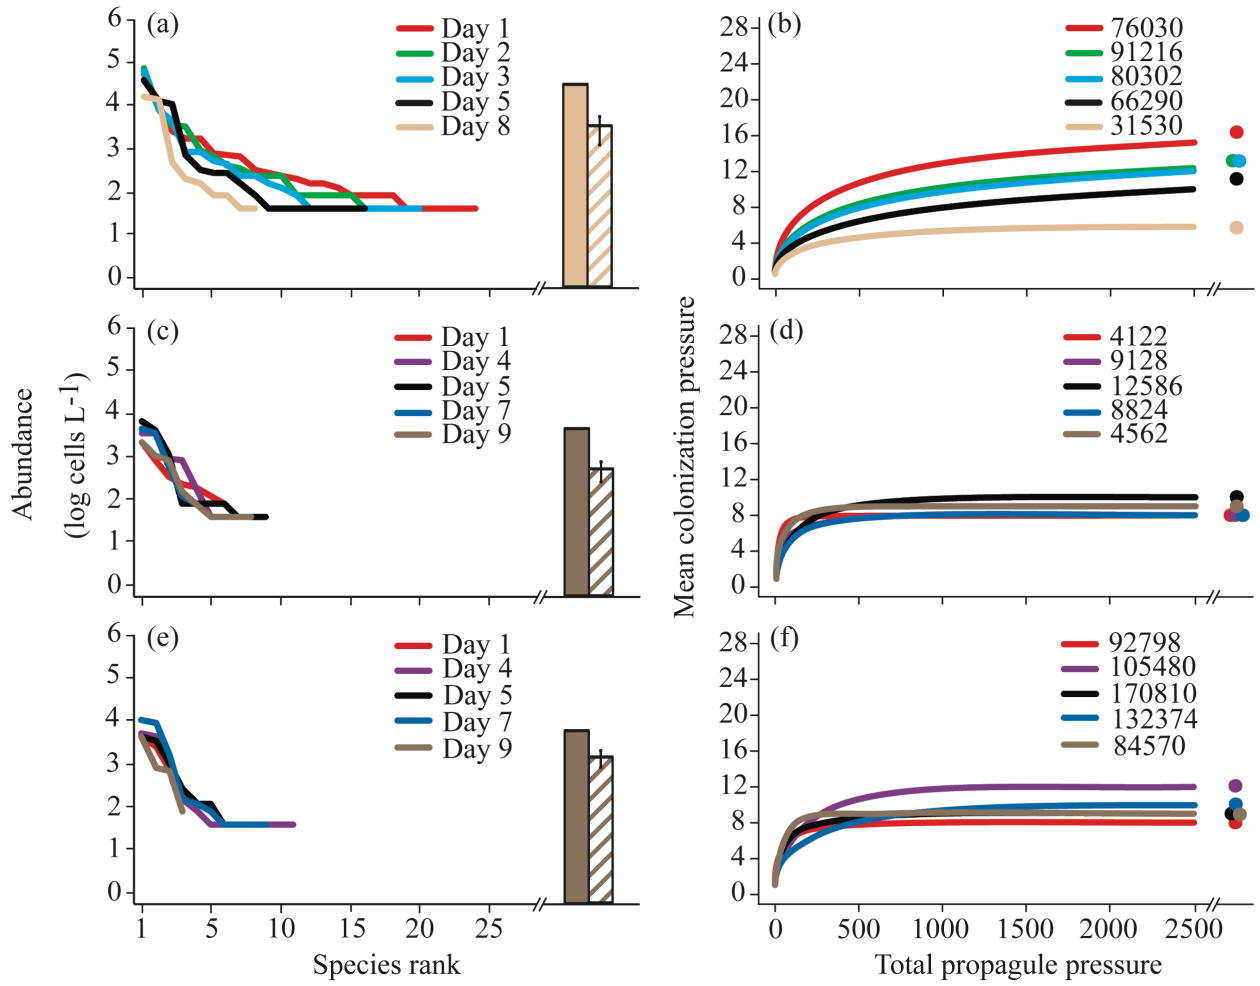

70

71 Figure S4.



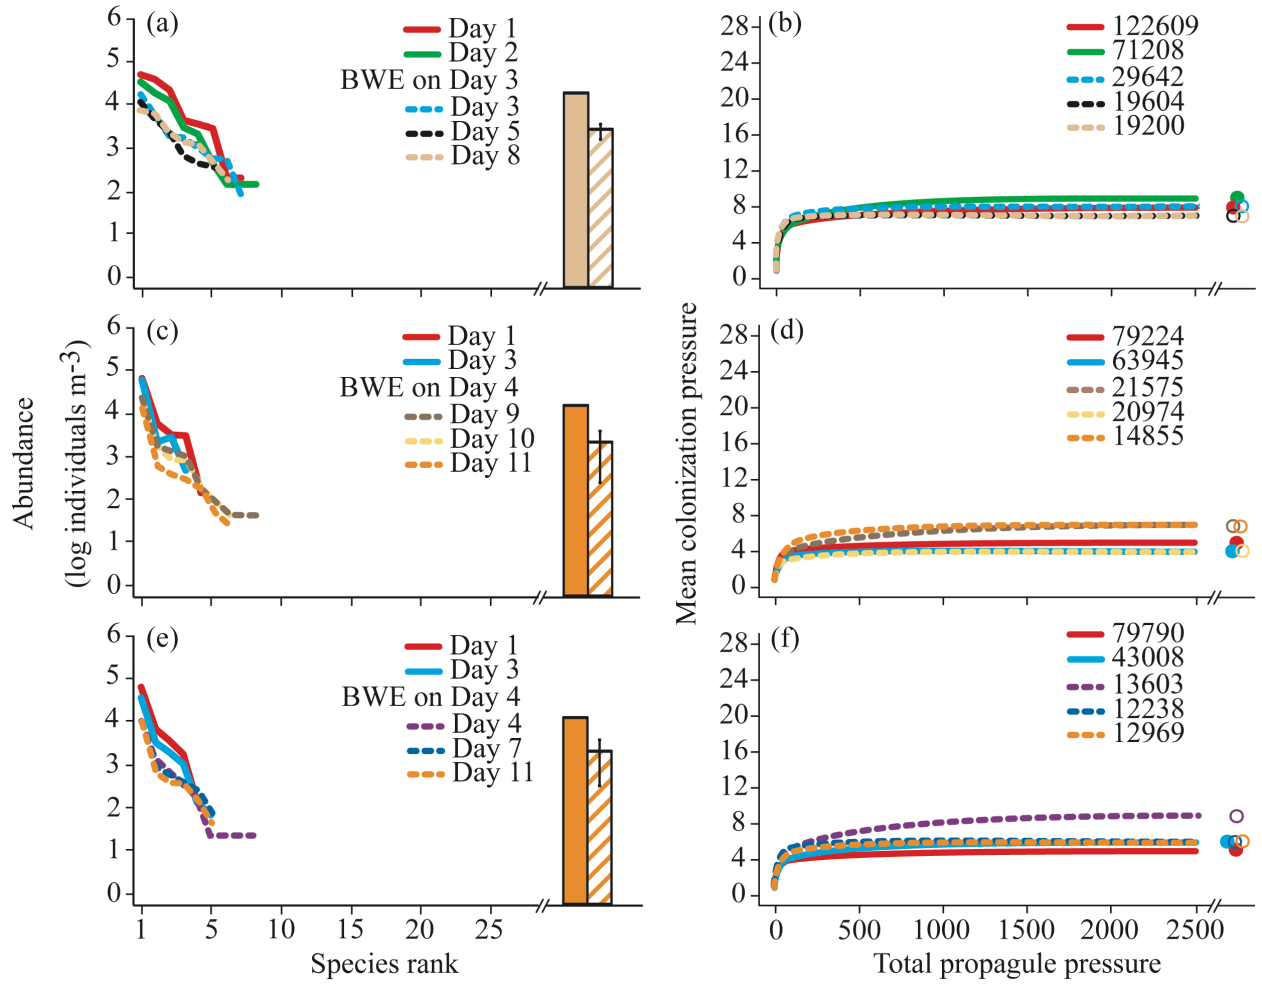

72

73 Figure S5.

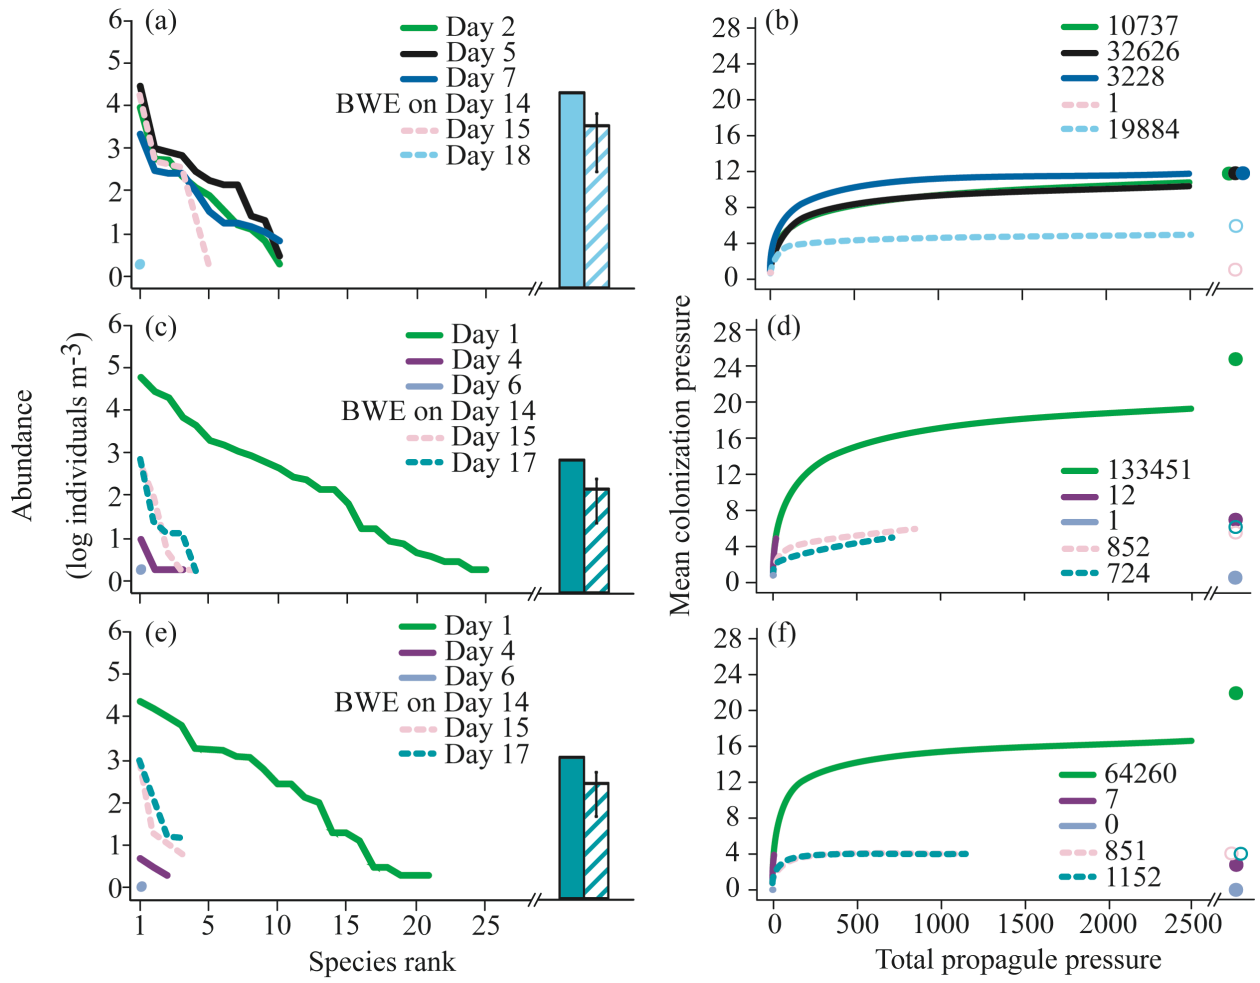

74

75 Figure S6.

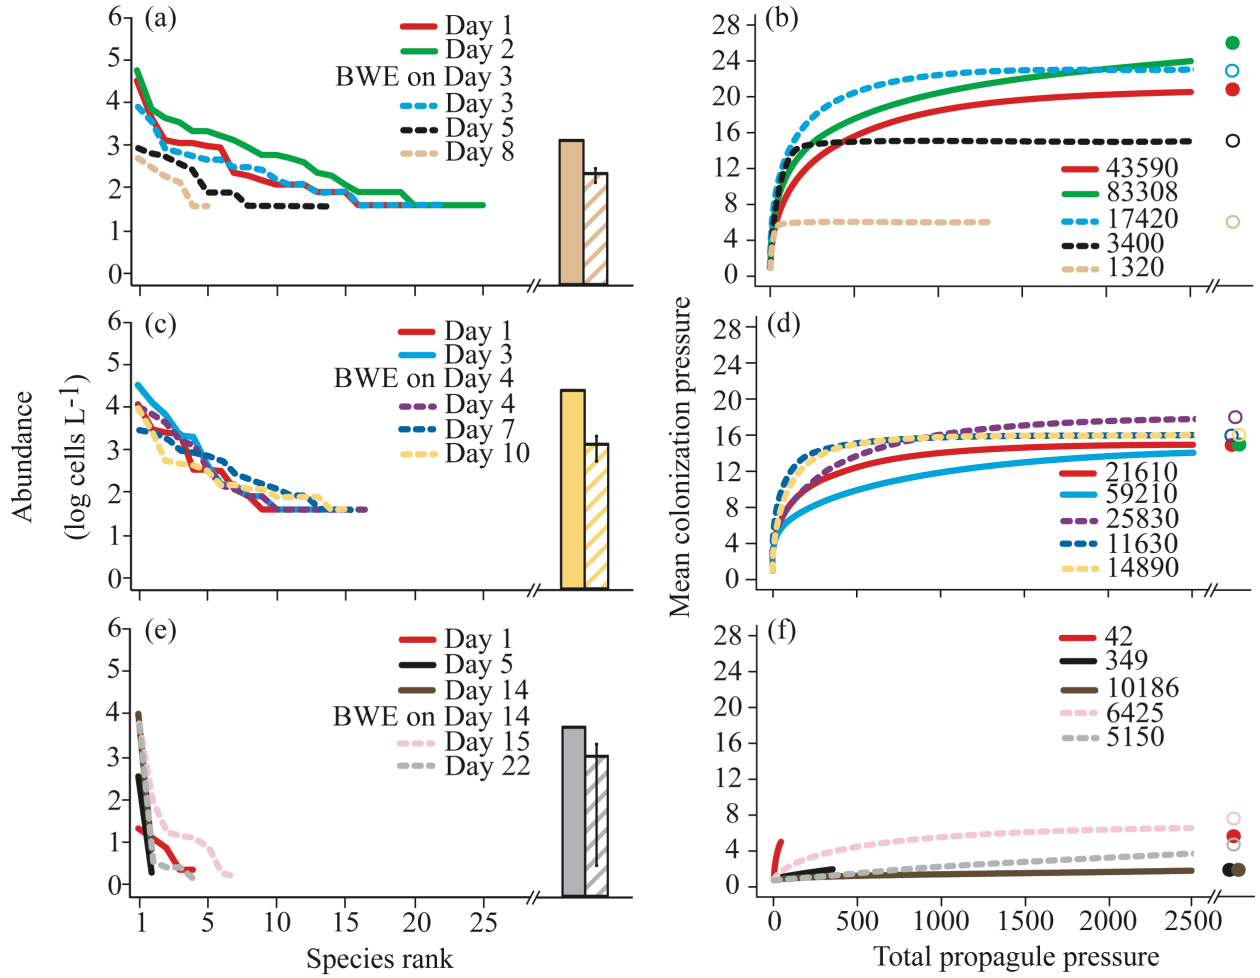

76

77 Figure S7.

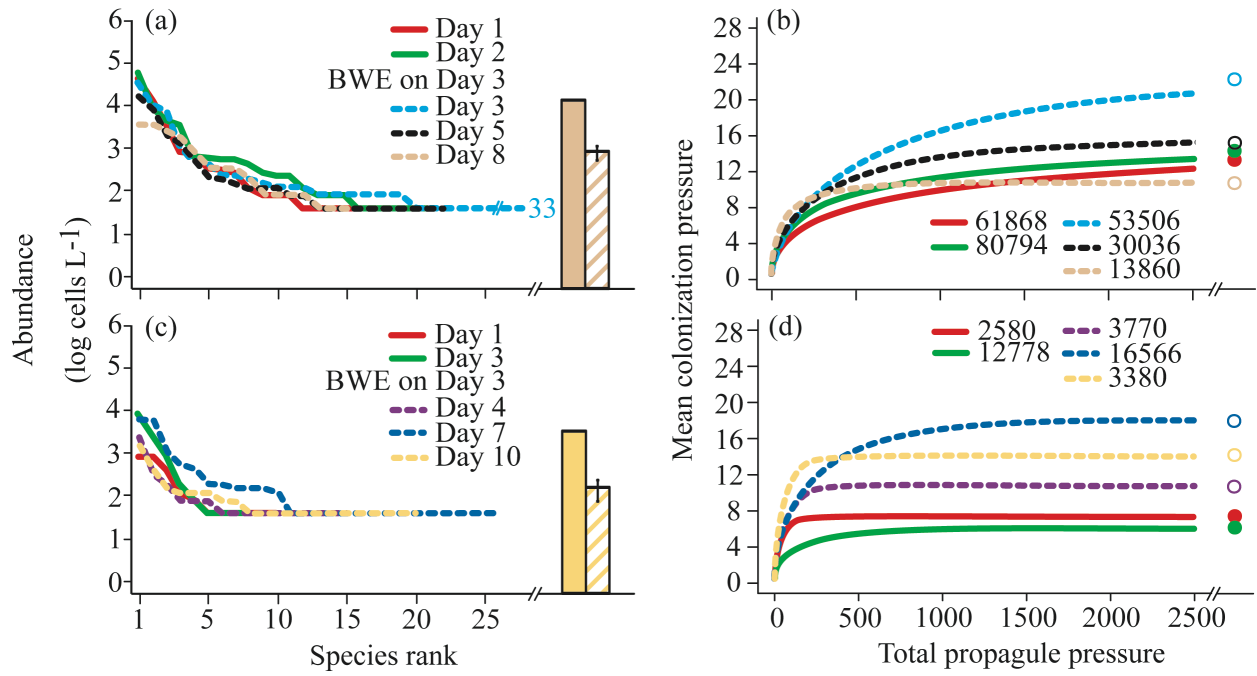

78

79 Figure S8.
